# Supplementary material for: An Active State of Charge Balancing Method With LC Energy Storage for Series Battery Pack
Source: Frontiers journal article supplement (doi:10.3389/fenrg.2022.901811), 2022-05-25
Supplement: Data_Sheet_2.docx [file Data_Sheet_2.docx]

#include "led.h"

#include "delay.h"

#include "key.h"

#include "sys.h"

#include "usart.h"

#include "timer.h"

#include "adc.h"

int main(void)

{

u16 adcx1=0,adcx2=0,adcx3=0,adcx4=0;

u16 Bat1=0,Bat2=0,Bat3=0,Bat4=0;

u16 max=0,min=0;

delay_init();

NVIC_PriorityGroupConfig(NVIC_PriorityGroup_2);

Adc_Init();

while(1)

{

adcx1=Get_Adc_Average(ADC_Channel_0,10);

adcx2=Get_Adc_Average(ADC_Channel_1,10);

adcx3=Get_Adc_Average(ADC_Channel_2,10);

adcx4=Get_Adc_Average(ADC_Channel_3,10);

Bat1=adcx1*(3300/4096); //

Bat2=adcx2*(3300/4096);

Bat3=adcx3*(3300/4096);

Bat4=adcx4*(3300/4096);

if(Bat2>Bat1)

{

max=Bat2;

}

else

{

max=Bat1;

}

if(Bat3>max)

{

max=Bat3;

}

if(Bat4>max)

{

max=Bat4;

}

if(Bat2<Bat1)

{

min=Bat2;

}

else

{

min=Bat1;

}

if(Bat3<min)

{

min=Bat3;

}

if(Bat4<min)

{

min=Bat4;

}

if(max-min>100)

{

RCC_Config() ;

TIM11_Config() ;

TIM12_Config() ;

}

else

{

TIM_SetCompare1(TIM1,0);

}

}

}

#include "adc.h"

#include "delay.h"

void Adc_Init(void)

{

ADC_InitTypeDef ADC_InitStructure;

GPIO_InitTypeDef GPIO_InitStructure;

RCC_APB2PeriphClockCmd(RCC_APB2Periph_GPIOA |RCC_APB2Periph_ADC1 , ENABLE );

GPIO_InitStructure.GPIO_Pin = GPIO_Pin_4|GPIO_Pin_5|GPIO_Pin_6|GPIO_Pin_7;

GPIO_InitStructure.GPIO_Mode = GPIO_Mode_AIN;

GPIO_Init(GPIOA, &GPIO_InitStructure);

RCC_ADCCLKConfig(RCC_PCLK2_Div6);

ADC_DeInit(ADC1);

ADC_InitStructure.ADC_Mode = ADC_Mode_Independent;

ADC_InitStructure.ADC_ScanConvMode = ENABLE;

ADC_InitStructure.ADC_ContinuousConvMode = ENABLE;

ADC_InitStructure.ADC_ExternalTrigConv = ADC_ExternalTrigConv_None;

ADC_InitStructure.ADC_DataAlign = ADC_DataAlign_Right;

ADC_InitStructure.ADC_NbrOfChannel = 4;

ADC_Init(ADC1, &ADC_InitStructure);

ADC_Cmd(ADC1, ENABLE);

ADC_ResetCalibration(ADC1);

while(ADC_GetResetCalibrationStatus(ADC1));

ADC_StartCalibration(ADC1);

while(ADC_GetCalibrationStatus(ADC1));

}

u16 Get_Adc(u8 ch)

{

ADC_RegularChannelConfig(ADC1, ADC_Channel_0, 1, ADC_SampleTime_239Cycles5 );

ADC_RegularChannelConfig(ADC1, ADC_Channel_1, 2, ADC_SampleTime_239Cycles5 );

ADC_RegularChannelConfig(ADC1, ADC_Channel_2, 3, ADC_SampleTime_239Cycles5 );

ADC_RegularChannelConfig(ADC1, ADC_Channel_3, 4, ADC_SampleTime_239Cycles5 );

ADC_SoftwareStartConvCmd(ADC1, ENABLE);

while(!ADC_GetFlagStatus(ADC1, ADC_FLAG_EOC ));

return ADC_GetConversionValue(ADC1);

}

u16 Get_Adc_Average(u8 ch,u8 times)

{

u32 temp_val=0;

u32 temp_va2=0;

u32 temp_va3=0;

u32 temp_va4=0;

u8 t;

for(t=0;t<times;t++)

{

temp_val+=Get_Adc(ADC_Channel_0);

temp_va2+=Get_Adc(ADC_Channel_1);

temp_va3+=Get_Adc(ADC_Channel_2);

temp_va4+=Get_Adc(ADC_Channel_3);

delay_ms(5);

}

return temp_val/times;

}

#include "timer.h"

#include "led.h"

#include "usart.h"

void RCC_Config(void)

{

RCC_APB2PeriphClockCmd(RCC_APB2Periph_GPIOE|RCC_APB2Periph_AFIO|RCC_APB2Periph_GPIOA|RCC_APB2Periph_GPIOB, ENABLE);

GPIO_PinRemapConfig(GPIO_FullRemap_TIM1, ENABLE); //È«Ó³Éä

RCC_APB2PeriphClockCmd(RCC_APB2Periph_TIM1, ENABLE);

TIM_InternalClockConfig(TIM1);

TIM_DeInit(TIM1);

}

void TIM11_Config(void)

{

GPIO_InitTypeDef GPIO_InitStructure;

TIM_TimeBaseInitTypeDef TIM_TimeBaseStructure;

TIM_OCInitTypeDef TIM_OCInitStructure;

GPIO_InitStructure.GPIO_Pin = GPIO_Pin_11;

GPIO_InitStructure.GPIO_Mode = GPIO_Mode_AF_PP;

GPIO_InitStructure.GPIO_Speed = GPIO_Speed_50MHz;

GPIO_Init(GPIOE, &GPIO_InitStructure);

TIM_TimeBaseStructure.TIM_Period = 100-1;

TIM_TimeBaseStructure.TIM_Prescaler = 72-1;

TIM_TimeBaseStructure.TIM_ClockDivision = TIM_CKD_DIV1;

TIM_TimeBaseStructure.TIM_CounterMode=TIM_CounterMode_CenterAligned2;

TIM_TimeBaseStructure.TIM_RepetitionCounter=1;

TIM_TimeBaseInit(TIM1, &TIM_TimeBaseStructure);

TIM_OCInitStructure.TIM_OCMode = TIM_OCMode_PWM2;

TIM_OCInitStructure.TIM_OutputState = TIM_OutputState_Enable;

TIM_OCInitStructure.TIM_Pulse =60;

TIM_OCInitStructure.TIM_OCPolarity = TIM_OCPolarity_Low;

TIM_OC2Init(TIM1, &TIM_OCInitStructure);

TIM_OC2PreloadConfig(TIM1, TIM_OCPreload_Enable);

TIM_ARRPreloadConfig(TIM1, ENABLE);

TIM_Cmd(TIM1, ENABLE);

TIM_CtrlPWMOutputs(TIM1, ENABLE);

}

void TIM12_Config(void)

{

GPIO_InitTypeDef GPIO_InitStructure;

TIM_TimeBaseInitTypeDef TIM_TimeBaseStructure;

TIM_OCInitTypeDef TIM_OCInitStructure;

GPIO_InitStructure.GPIO_Pin = GPIO_Pin_9;

GPIO_InitStructure.GPIO_Mode = GPIO_Mode_AF_PP;

GPIO_InitStructure.GPIO_Speed = GPIO_Speed_50MHz;

GPIO_Init(GPIOE, &GPIO_InitStructure);

TIM_TimeBaseStructure.TIM_Period = 100-1;

TIM_TimeBaseStructure.TIM_Prescaler = 72-1;

TIM_TimeBaseStructure.TIM_ClockDivision = TIM_CKD_DIV1;

TIM_TimeBaseStructure.TIM_CounterMode=TIM_CounterMode_CenterAligned3 ;

TIM_TimeBaseInit(TIM1, &TIM_TimeBaseStructure);

TIM_OCInitStructure.TIM_OCMode = TIM_OCMode_PWM2;

TIM_OCInitStructure.TIM_OutputState = TIM_OutputState_Enable;

TIM_OCInitStructure.TIM_OCPolarity = TIM_OCPolarity_High;

TIM_OCInitStructure.TIM_Pulse =80;

TIM_OC1Init(TIM1,&TIM_OCInitStructure);

TIM_OC1PreloadConfig(TIM1, TIM_OCPreload_Enable);

TIM_ARRPreloadConfig(TIM1, ENABLE);

TIM_Cmd(TIM1, ENABLE);

TIM_CtrlPWMOutputs(TIM1, ENABLE);

}
